# Supplementary material for: Bio-inspired synthesis of NaCl-type CoxNi1−xO (0 ≤ x < 1) nanorods on reduced graphene oxide sheets and screening for asymmetric electrochemical capacitors
Source: Royal Society of Chemistry journal article supplement (doi:10.1039/c2jm31057k), 2012-01-01
Supplement: c2jm31057k.pdf [file c2jm31057k.pdf]

## Electronic Supplementary Material

### **Bio-inspired Synthesis of NaCl-type $\text{Co}_x\text{Ni}_{(1-x)}\text{O}$ ( $0 \leq x < 1$ ) Nanorods on Reduced Graphene Oxide Sheets and Screening for Asymmetric Electrochemical Capacitors**

Junwu Xiao, Shihe Yang\*

Department of Chemistry, William Mong Institute of Nano Science and Technology,  
The Hong Kong University of Science and Technology, Clear Water Bay, Kowloon,  
Hong Kong  
E-mail: [chsyang@ust.hk](mailto:chsyang@ust.hk)

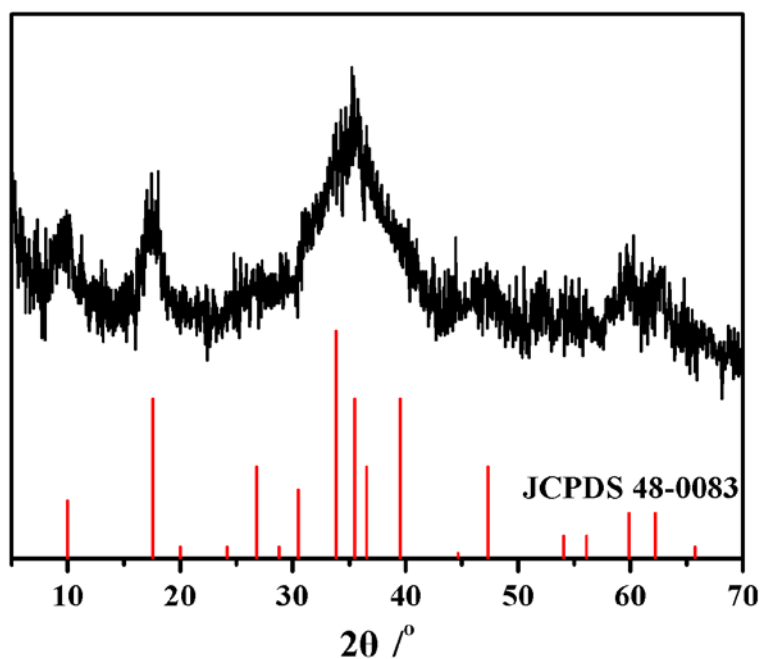

**Figure SI-1.** XRD patterns of the nanocomposites formed from the supersaturation Co-Ni bicarbonate solution after the slow escape of  $\text{CO}_2$  (Step I) and the following hydrothermal processes (Step II), which is in consistent with the standard pattern of  $\text{Co}(\text{CO}_3)_{0.5}(\text{OH})\cdot 0.11\text{H}_2\text{O}$  (JCPDS 48-0083).

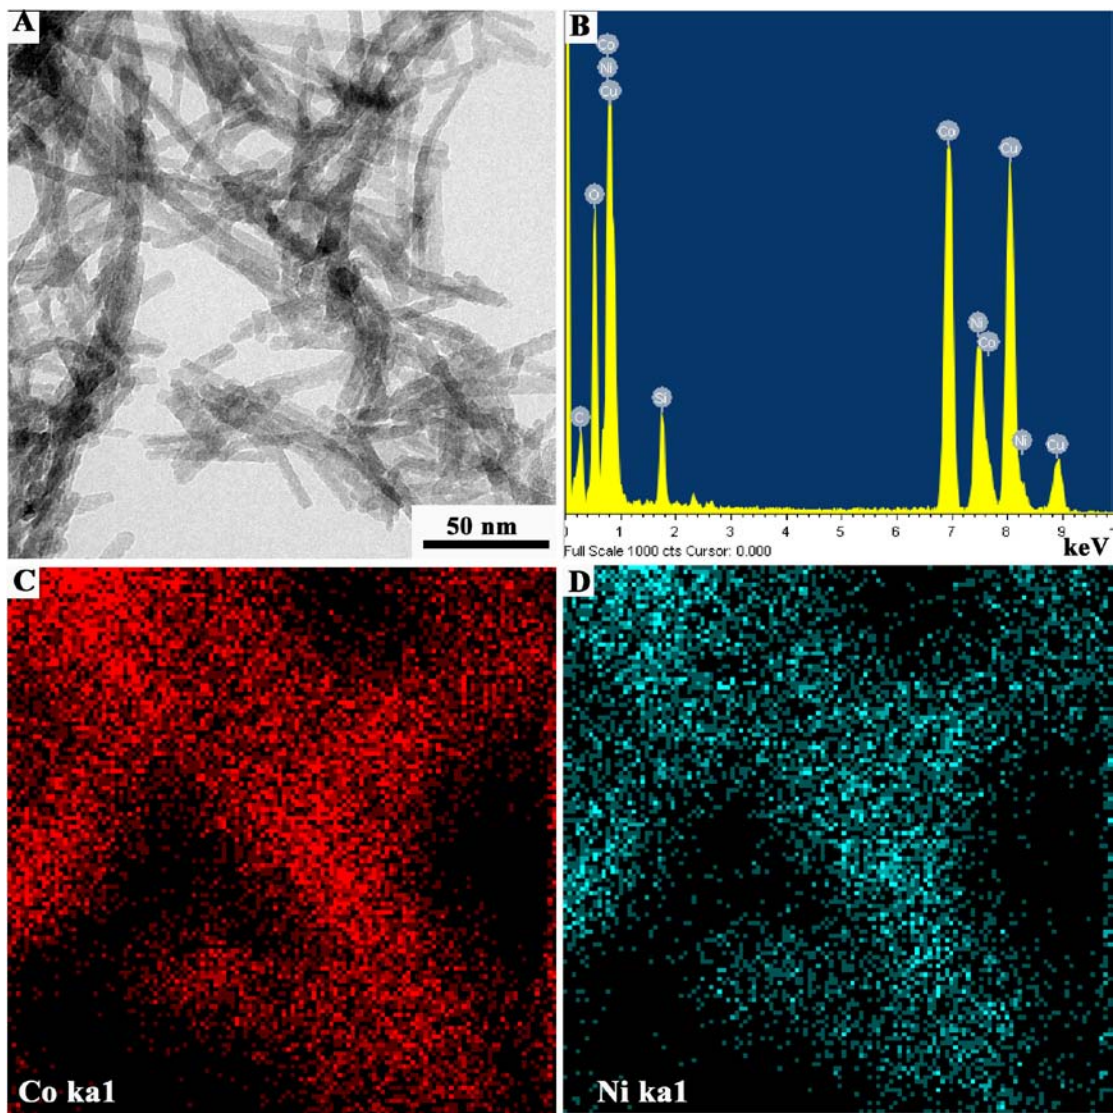

**Figure SI-2.** (A) TEM image, (B) EDX spectrum, (C) Co and (D) Ni mappings of  $\text{Co}_x\text{Ni}_{1-x}(\text{CO}_3)_{0.5}(\text{OH})$  nanorods, which are grown on graphene surface. Together with TEM image (A) and EDX spectrum (B), the Co and Ni mappings in C and D reveal that Co and Ni elements are uniformly distributed in the nanorods.

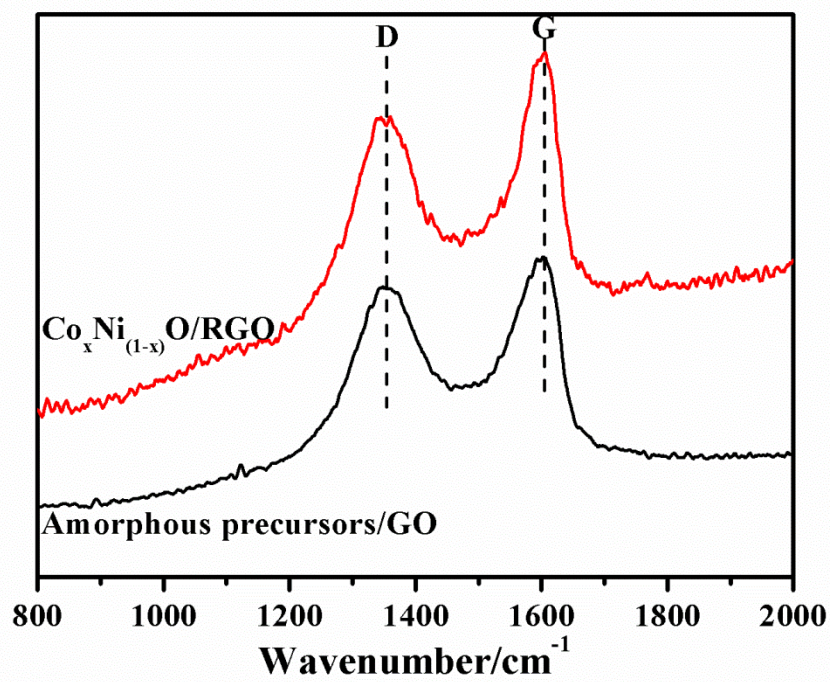

**Figure SI-3.** Raman spectra of amorphous precursors/graphene oxide (GO) and Co<sub>x</sub>Ni<sub>1-x</sub>O/reduced graphene oxide (RGO) nanocomposites.

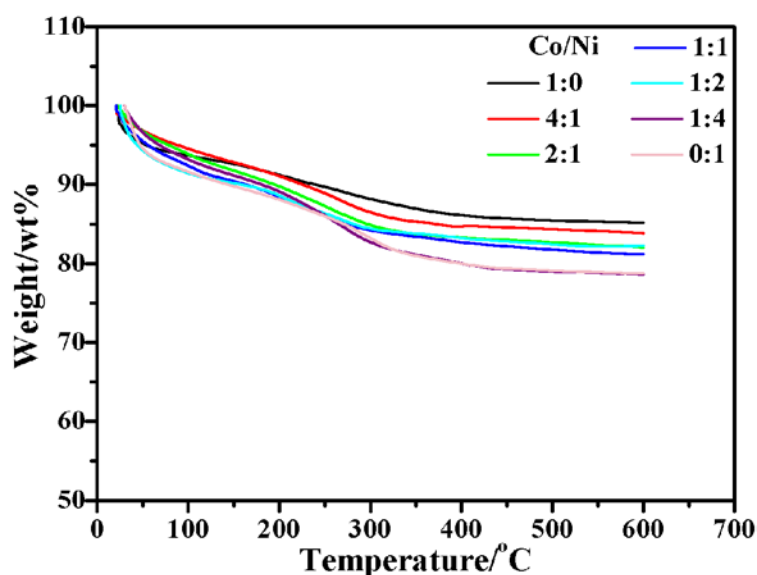

**Figure SI-4.** TGA curves of Co<sub>x</sub>Ni<sub>(1-x)</sub>O/RGO nanocomposites from 30 to 600 °C under air atmosphere. Notice that before the TGA test, the samples had been thermally treated at 300 °C under N<sub>2</sub> atmosphere to form the Co<sub>x</sub>Ni<sub>1-x</sub>O/RGO composites. Thus, the first weight loss was due to the escape of free water, and the second weight loss at > 200 °C should be ascribed to the decomposition and combustion of RGO.

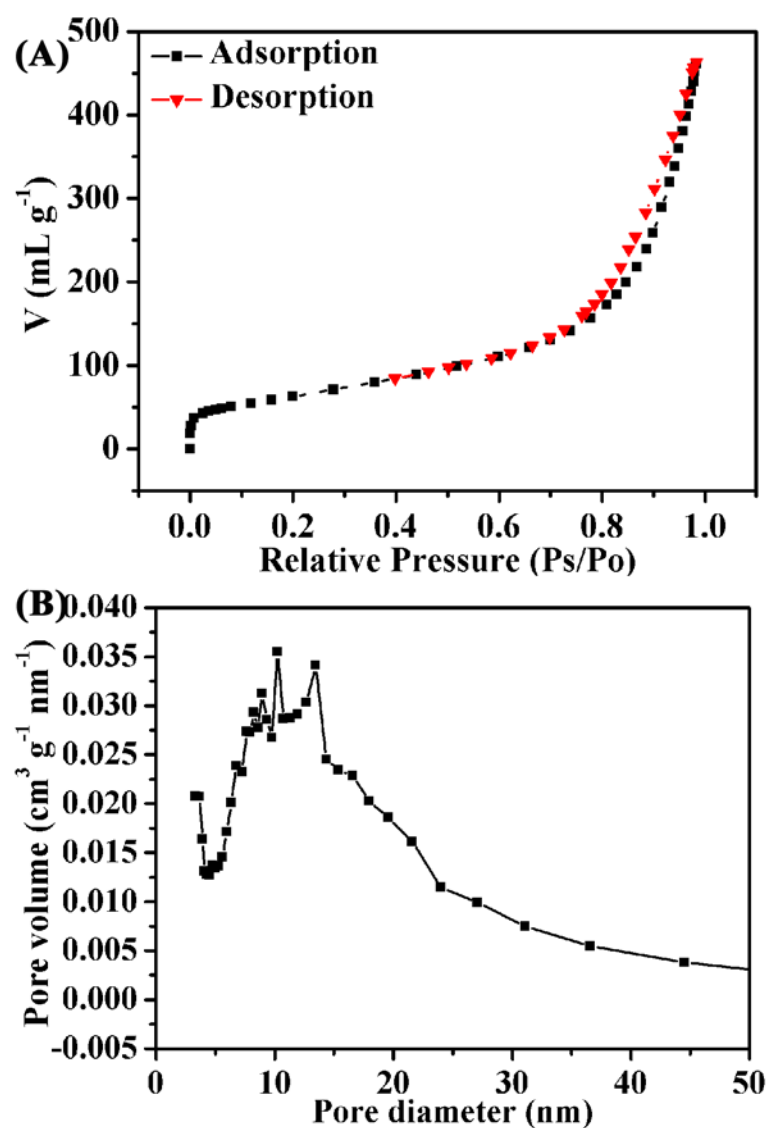

**Figure SI-5.** (A) Nitrogen adsorption and desorption isotherms of  $\text{Co}_{0.45}\text{Ni}_{0.55}\text{O}/\text{RGO}$  nanocomposites measured at standard temperature and pressure, and (B) the corresponding BJH pore size distribution plots.

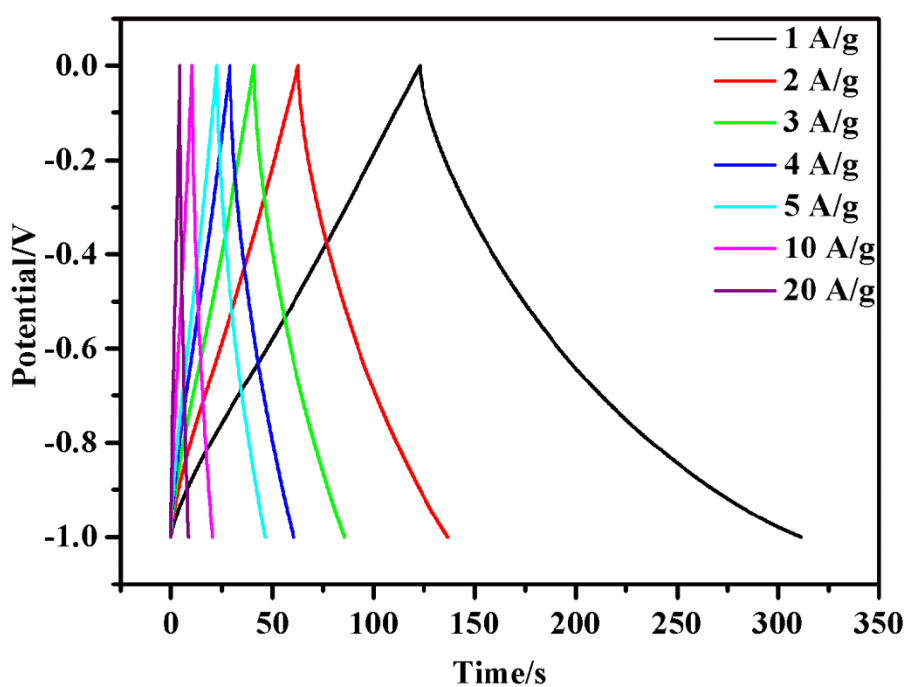

**Figure SI-6.** The galvanostatic charge-discharge curves of reduced graphene oxide (RGO) in 1.0 M KOH electrolyte at various current densities. The specific capacitance are 188.4, 147.9, 134.3, 125.9, 119.6, 99.8, and 83.2 F/g at the current density of 1, 2, 3, 4, 5, 10, and 20 A/g, respectively, calculated according to the equation  $C=(I\Delta t)/(m\Delta V)$  ( $I/m$ : the current density;  $\Delta t$ : the time of the discharge segment;  $\Delta V$ : represents the voltage change after a full charge or discharge)
